# Supplementary material
Source: PubMed Central journal article supplement (PMC3374360)
Supplement: 97320630008483S1.pdf [file 97320630008483S1.pdf]

## Supplementary material:

**Table 1:** A description about the tables and its attributes of FBIS database

| Table name      | Brief description                                                                                                               |
|-----------------|---------------------------------------------------------------------------------------------------------------------------------|
| fishinfo        | This is a master table of FBIS database which contains all physical information including species name, common name and family. |
| taxonomy        | This table contains taxonomic data about species which belongs into 'fishinfo' table.                                           |
| barcode_sources | This table exists with fields relevant to barcode and molecular information.                                                    |
| dnabarcodes     | This table provides a linkage between the tables 'fishinfo' and 'barcode_sources'.                                              |
| molecular_info  | This table is a complement of 'barcode sources' comprises with fields like sequence and primer.                                 |
| admin_info      | This table strictly engages for administration data and manages it separately from main table.                                  |
